# Supplementary material
Source: PubMed Central journal article supplement (PMC8904141)
Supplement: mmc1.pdf [file mmc1.pdf]

## Appendix A: Survey (English)

The first questions regard your thoughts about COVID-19 in general.

- When thinking about COVID-19, how likely do you think you are to get sick?
  - extremely unlikely
  - somewhat unlikely
  - neither likely nor unlikely
  - somewhat likely
  - extremely likely
- When thinking about COVID-19 vaccine, how important do you think it is for preventing community spread of COVID-19?
  - Not at all important
  - Slightly important
  - Moderately important
  - Very important
  - Extremely important
- When thinking about COVID-19 vaccine, how safe do you think it is?
  - Not at all safe
  - Slightly safe
  - Moderately safe
  - Very safe
  - Extremely safe

These next questions refer to your thoughts about vaccination for COVID-19.

- Being vaccinated for COVID-19 will: (disagree, unsure, agree)
  - Protect me from getting COVID-19
  - Protect my family and friends from COVID-19
  - Allow many pre-pandemic activities to resume
  - Be something people I trust think I should do
  - Make me worried because of how new the vaccine is
  - Make me worried because of how quickly the vaccine was created
  - Make me worried because of the government's role in vaccine development
  - Make me worried about unknown side effects
  - Make me worried about known side effects
  - Be something people I trust don't think I should do
- Which side effect do you worry most about? (*asked if known side effect – agree is selected*) (*single selection*)
  - Fever and chills
  - Tiredness
  - Headache

- Arm pain and swelling
- Anaphylaxis and allergic reactions
- What might help you and/or your healthcare team in making a decision about getting the COVID-19 vaccine? (please rank from 1 to 3 with 1 being most helpful)
  - Recommendation from your healthcare provider during a one-on-one encounter
  - Encouragement from a trusted source
    - From which of the following sources would you most trust information? (*asked if encouragement from a trusted source is ranked first, single selection option*)
      - Professional organization
      - Employer
      - Religious leader
      - Community leader
      - Peers
      - Health department
      - Government
      - Other (please specify below) \_\_\_\_\_
  - Educational information
    - How would you most prefer to receive educational information? (*asked if educational information is ranked first, single selection option*)
      - Handout
      - Video
      - Radio
      - Television
      - Social media
      - Other (please specify below) \_\_\_\_\_
    - What topic would be the most helpful to provide more information about? (*asked if educational information is ranked first, single selection option*)
      - How the vaccine works
      - Differences between approved vaccines
      - Side effects from the vaccine
      - Frequently asked questions about the vaccine
      - Other (please specify below) \_\_\_\_\_
- Have you received a vaccine for COVID-19?
  - Yes
  - Offered but declined
  - Not offered
  - Prefer not to answer

- Will you be vaccinated for COVID-19 when the shot is next made available to you?  
(asked if have you received a vaccine for COVID-19 is answered with offered but declined or not offered)
  - Definitely yes
  - Probably yes
  - Unsure
  - Probably not
  - Definitely not

These questions provide basic details about you and, if applicable, the patient population you serve.

- What is your gender?
  - Male
  - Female
  - Non-binary / third gender
  - Other \_\_\_\_\_
  - Prefer not to say
- What is your age?
  - Younger than 25 years
  - 25-39 years
  - 40 – 64 years
  - 65 years or older
- What is your position or role?
  - Physician
  - Advanced practice provider (PA, APN)
  - Other professional degree (PsyD/PhD/PharmD, PT, OT, Dietician)
  - Nurse (RN, LPN)
  - Medical Assistant (MA, CNA)
  - Ancillary Staff (SW, CM)
  - Community health worker
  - Other (please specify below) \_\_\_\_\_
- Where is your clinic or organization is located? (*drop-down option of states, Puerto Rico, and other US territories, not listed option*)
- Do you identify as a member of a refugee, immigrant, or migrant community?
  - Yes
    - What refugee, immigrant, or migrant community do you identify with?  
\_\_\_\_\_
  - No
  - Prefer not to say
- Do you interact directly with patients?
  - No

- Yes
  - Are your patients primarily located in a rural area (such as a location where less than 10,000 people reside)?
    - Yes
    - No
  - What percentage of your patients do you estimate are first generation refugees/immigrants or their children?
    - Less than 25%
    - 25-49%
    - 50-74%
    - 75% or greater
  - Which refugee/immigrant patient population(s) do you most frequently interact with? (list up to three) (*free text option on all surveys; for MCN distribution checkboxes were also offered for Mexican, Puerto Rican, Central American, Other Latin American, Haitian, Other Caribbean, West African, East African, Pacific Islander, and Southeast Asian options*)

The final questions ask about what you've heard from **patients** about COVID-19 vaccines. (*asked only if answered yes to interacting directly with patients*)

- How frequently do **your patients** mention the following concerns about COVID-19 vaccines? Concern about: (rarely, sometimes, most of the time)
  - How new the vaccine is
  - How the vaccine was made
    - What about how the vaccine was made are **your patients** concerned about? (select all that apply) (*asked if this concern was indicated most of the time*)
      - How quickly it was developed
      - The government's role in developing the vaccine
      - The healthcare system's role in developing the vaccine
      - Other (please specify below) \_\_\_\_\_
  - How the vaccine works
  - What the vaccine contains
    - What types of vaccine contents are **your patients** concerned about? (select all that apply) (*asked if this concern was indicated most of the time*)
      - Live virus
      - Microchips
      - Cells from aborted fetuses
      - Pork or gelatin products
      - Other (please specify below) \_\_\_\_\_
  - How safe the vaccine is

- What about the vaccine's safety are **your patients** concerned about?  
(select all that apply) (*asked if this concern was indicated most of the time*)
  - The speed at which it was developed and/or approved
  - Unknown genetic effects of the vaccine
  - Little or lack of testing in the population your patients identify with
  - Little or lack of testing among certain age groups
  - Little or lack of testing for reproductive side effects
  - Other (please specify below) \_\_\_\_\_
- Experiencing side effects from the vaccine
  - What side effects are **your patients** concerned about? (select all that apply) (*asked if this concern was indicated most of the time*)
    - Arm pain and swelling
    - Fever and chills
    - Tiredness
    - Headache
    - Anaphylaxis and allergic reactions
- What might help **your patients** in making a decision about getting the COVID-19 vaccine? (please rank from 1 to 3 with 1 being most helpful)
  - Recommendation from their healthcare provider during a one-on-one encounter
  - Encouragement from a trusted source
    - From which of the following sources would **your patients** most trust information? (*asked if encouragement from a trusted source was ranked first, single selection*)
      - Religious leader
      - Community leader
      - Peers
      - Employer
      - Health department
      - Government
      - Other (please specify below) \_\_\_\_\_
  - Educational information
    - How do you think **your patients** would most prefer to receive this information? (*asked if educational information was ranked first, single selection*)
      - Handout
      - Video
      - Radio
      - Television
      - Social media

- Other (please specify below) \_\_\_\_\_
- What information do you think will be most helpful to provide to **your patients?** (*asked if educational information was ranked first, single selection*)
  - How the vaccine works
  - Differences between approved vaccines
  - Side effects from the vaccine
  - Frequently asked questions about the vaccine
  - Other (please specify below) \_\_\_\_\_

### Appendix B: Survey (Spanish)

Las primeras preguntas son acerca de sus pensamientos sobre COVID-19 en general.

- Cuándo piensa en COVID-19, ¿qué tan probable es que usted se enferme?
  - muy improbable
  - algo improbable
  - ni probable ni improbable
  - poco probable
  - muy probable
- Al pensar en la vacuna contra COVID-19, ¿qué tan importante cree usted que es para prevenir la propagación comunitaria del COVID-19?
  - No es nada importante
  - Ligeramente importante
  - Moderadamente importante
  - Muy importante
  - Extremadamente importante
- Al pensar en la vacuna contra COVID-19, ¿qué tan segura cree que sea?
  - Nada segura
  - Ligeramente segura
  - Moderadamente segura
  - Muy segura
  - Extremadamente segura

Las siguientes preguntas se refieren a lo que piensa sobre la vacunación contra COVID-19.

- Estar vacunado contra COVID-19 podría: (de acuerdo, no estoy seguro, en desacuerdo)
  - Protegerme de contagiarme de COVID-19
  - Proteger a mi familia y amigos del COVID-19
  - Permitir que muchas actividades que se realizaban antes de la pandemia se reanuden
  - Ser algo que la gente en la que confío cree que debo hacer

- Preocuparme por lo nuevo que es la vacuna
- Preocuparme por la rapidez con la que se creó la vacuna
- Preocuparme por el papel del gobierno en el desarrollo de la vacuna
- Preocuparme por los efectos secundarios desconocidos
- Preocuparme por los efectos secundarios conocidos
- Ser algo que la gente en la que confío cree que no debo hacer
- ¿Qué efecto secundario le preocupa más? (*si conoce el efecto secundario – seleccione de acuerdo*) (*selección única*)
  - Fiebre y escalofríos
  - Cansancio
  - Dolor de cabeza
  - Dolor e hinchazón en el brazo
  - Anafilaxia y reacción alérgica
- ¿Qué podría ayudarle a usted y/o a su equipo de atención médica a tomar una decisión sobre ponerse la vacuna COVID-19? (por favor, clasifique del 1 al 3, donde 1 es lo más útil)
  - Recomendación de su proveedor de atención médica durante una reunión uno a uno
  - Motivación por parte una fuente confiable
    - ¿De cuál de las siguientes fuentes de información confía más? (*seleccione solo una respuesta*)
      - Organización profesional
      - Empleador
      - Líder religioso
      - Líder comunitario
      - Compañeros
      - Departamento de Salud
      - Gobierno
      - Otros (especifique) \_\_\_\_\_
  - Información educativa
    - ¿Cómo preferiría recibir información educativa? (*seleccione una respuesta*)
      - Folleto (material impreso)
      - Video
      - Radio
      - Televisión
      - Redes sociales
      - Otros (especifique) \_\_\_\_\_
    - ¿Qué tema le sería más útil tener más información? (*seleccione una respuesta*)
      - Cómo funciona la vacuna

- Diferencias entre las vacunas aprobadas
  - Efectos secundarios de la vacuna
  - Preguntas frecuentes sobre la vacuna
  - Otros (especifique) \_\_\_\_\_
- ¿Ha recibido una vacuna para COVID-19?
  - Sí
  - Ofrecida pero rechazada
  - No se le ha ofrecido
  - Prefiere no responder
- ¿Se piensa vacunar cuando la vacuna COVID-19 esté disponible para usted? (*sólo se si responde a la pregunta anterior - → ofrecida pero rechazada o no se le ha ofrecido*)
  - Definitivamente sí
  - Probablemente sí
  - Indeciso
  - Probablemente no
  - Definitivamente no

Estas preguntas proporcionan información básica sobre usted y, si corresponde, de sus pacientes.

- ¿Cuál es su género?
  - Masculino
  - Femenino
  - No binario / tercer género
  - Otro (especifique)
  - Prefiere no responder
- ¿Cuántos años tiene?
  - Menos de 25 años
  - 25-39 años
  - 40 – 64 años
  - 65 años o más
- ¿Cuál es su posición o papel?
  - Médico
  - Proveedor de servicios avanzados (PA, APN)
  - Otro título profesional (PsyD/PhD/PharmD, PT, OT, Dietista)
  - Enfermera (RN, LPN)
  - Asistente Médico (MA, CNA)
  - Personal auxiliar (SW, CM)
  - Trabajador de salud/alcance comunitario
  - Otros (especifique)\_\_\_\_\_
- ¿Dónde se localiza su clínica u organización? (*opción desplegable de estados, Puerto Rico y otros territorios de EE. UU., opción no listada*)



- ¿Usted se identifica como miembro de una comunidad de refugiados, inmigrantes o migrantes?
  - Sí
    - ¿Con qué comunidad de refugiados, inmigrantes o migrantes se identifica? \_\_\_\_\_
  - No
  - Prefiere no responder
- ¿Interactúa directamente con los pacientes?
  - No
  - Sí
    - ¿Sus pacientes se encuentran principalmente en una zona rural (donde vivan menos de 10000 personas)?
      - Si
      - No
    - ¿Qué porcentaje de sus pacientes o hijos de sus hijos estima que son primera generación de inmigrantes?
      - Menos del 25%
      - 25-49%
      - 50-74%
      - 75% o más
    - ¿Con qué población(s) de pacientes inmigrantes interactúa con más frecuencia? (seleccione hasta tres) (*opción de selección múltiple*)
      - Mexicana
      - Puertorriqueña
      - Centroamericana
      - Otras latinoamericanas
      - Haitiana
      - Otros caribeños
      - África Occidental
      - África oriental
      - Isleño del Pacífico
      - Sudeste asiático
      - Otras (especifique)\_\_\_\_\_

Estas preguntas finales son acerca de lo que usted ha escuchado de **los pacientes** sobre las vacunas contra COVID-19. (*solo se pregunta si responde que si interactúa directamente con pacientes*)

- ¿Con qué frecuencia **mencionan sus pacientes** las siguientes preocupaciones sobre las vacunas contra COVID-19? Preocupación por: (muy pocas veces, a veces, la mayoría de las veces)

- Qué tan nueva es la vacuna
- Cómo se hizo la vacuna
  - ¿Qué les preocupa específicamente **sus pacientes** sobre cómo se hizo la vacuna? (seleccione todas las respuestas que correspondan) (*opción de selección múltiple*)
    - La rapidez con la que se desarrolló
    - El papel del gobierno en el desarrollo de la vacuna
    - El papel del sistema de salud en el desarrollo de la vacuna
    - Otros (especifique) \_\_\_\_\_
- Cómo funciona la vacuna
- Lo que contiene la vacuna
  - ¿Qué les preocupa a **sus pacientes** sobre el contenido de la vacuna? (seleccione todas las respuestas que correspondan) (*opción de selección múltiple*)
    - Virus vivo
    - Microchips
    - Células de fetos abortados
    - Productos de cerdo o gelatina
    - Otros (especifique) \_\_\_\_\_
- Qué tan segura es la vacuna
  - ¿Qué les preocupa a **sus pacientes** sobre la seguridad de la vacuna? (seleccione todo lo que corresponda) (*opción de selección múltiple*)
    - La velocidad a la que se desarrolló y/o se aprobó
    - Efectos genéticos desconocidos de la vacuna
    - Poca o falta de ensayos o pruebas en la población con la que sus pacientes se identifican
    - Poca o falta de ensayos o pruebas entre ciertos grupos de edad
    - Poca o falta de ensayos o pruebas sobre efectos secundarios en los sistemas reproductivos
    - Otros (especifique) \_\_\_\_\_
- Experimentar efectos secundarios de la vacuna
  - ¿Qué les preocupa a **sus pacientes** sobre los efectos secundarios? (seleccione todas las respuestas que correspondan) (*opción de selección múltiple*)
    - Dolor e hinchazón en el brazo
    - Fiebre y escalofríos
    - Cansancio
    - Dolor de cabeza
    - Anafilaxia y reacciones alérgicas
- ¿Qué podría ayudar a **sus pacientes** a tomar una decisión sobre ponerse la vacuna contra COVID-19? (por favor, clasifique del 1 al 3, donde 1 es lo más útil)
  - Recomendación de su proveedor de atención médica durante un encuentro uno a uno

- Motivación por parte de una fuente de confianza
  - ¿En cuáles de las siguientes fuentes **confían** más sus pacientes? (*selección única*)
    - Líder religioso
    - Líder comunitario
    - Compañeros/amigos
    - Empleador
    - Departamento de Salud
    - Gobierno
    - Otros (especifique) \_\_\_\_\_
- Información educativa
  - ¿Cómo cree que **sus pacientes** prefirieren recibir esta información? (*selección única*)
    - Folleto/material impreso
    - Video
    - Radio
    - Televisión
    - Redes sociales
    - Otros (especifique) \_\_\_\_\_
  - ¿Qué información cree usted que sería más útil proporcionar a **sus pacientes**? (*selección única*)
    - Cómo funciona la vacuna
    - Diferencias entre las vacunas aprobadas
    - Efectos secundarios de la vacuna
    - Preguntas frecuentes sobre la vacuna
    - Otros (especifique) \_\_\_\_\_
